# Supplementary material for: Genome-Wide Identification and Expression Analysis of Isopentenyl transferase Family Genes during Development and Resistance to Abiotic Stresses in Tea Plant (Camellia sinensis)
Source: MDPI journal article supplement (doi:10.3390/plants11172243), 2022-08-29
Supplement: s1 [file s1]

**Table S3** *Cis*-elements of the 13 CsIPT promoters

| <div><div></div><div><i>cis</i>-element</div><div>Gene name</div></div> | light          | ABA            | GA             | SA             | auxin          | MeJ                 | low-t                            | anaerob             | drought          | circa           | meristem       |
|-------------------------------------------------------------------------|----------------|----------------|----------------|----------------|----------------|---------------------|----------------------------------|---------------------|------------------|-----------------|----------------|
|                                                                         | responsi<br>ve | responsi<br>ve | responsi<br>ve | responsi<br>ve | responsi<br>ve | A<br>responsi<br>ve | emperat<br>ure<br>responsi<br>ve | ic<br>inductio<br>n | inducibi<br>lity | dian<br>control | expressio<br>n |
| <i>CsIPT2a</i>                                                          | 7              | 1              | 3              | 1              | 1              | 0                   | 0                                | 2                   | 2                | 0               | 2              |
| <i>CsIPT2b</i>                                                          | 8              | 1              | 2              | 1              | 1              | 0                   | 0                                | 2                   | 2                | 1               | 3              |
| <i>CsIPT3.1</i>                                                         | 22             | 12             | 0              | 0              | 0              | 0                   | 0                                | 4                   | 0                | 0               | 0              |
| <i>CsIPT3.2</i>                                                         | 13             | 4              | 0              | 0              | 1              | 0                   | 0                                | 3                   | 0                | 0               | 0              |
| <i>CsIPT5.1a</i>                                                        | 7              | 1              | 2              | 3              | 0              | 4                   | 0                                | 2                   | 1                | 0               | 0              |
| <i>CsIPT5.1b</i>                                                        | 14             | 1              | 1              | 3              | 0              | 4                   | 0                                | 4                   | 2                | 0               | 0              |
| <i>CsIPT5.2a</i>                                                        | 8              | 3              | 1              | 0              | 0              | 10                  | 0                                | 2                   | 2                | 0               | 1              |
| <i>CsIPT5.2b</i>                                                        | 7              | 0              | 0              | 0              | 0              | 0                   | 0                                | 2                   | 1                | 0               | 0              |
| <i>CsIPT6.1</i>                                                         | 14             | 7              | 0              | 1              | 0              | 8                   | 0                                | 1                   | 0                | 0               | 0              |
| <i>CsIPT6.2</i>                                                         | 8              | 4              | 0              | 0              | 0              | 4                   | 0                                | 1                   | 0                | 0               | 0              |
| <i>CsIPT6.3</i>                                                         | 10             | 0              | 0              | 0              | 0              | 2                   | 0                                | 0                   | 0                | 0               | 1              |
| <i>CsIPT6.4</i>                                                         | 6              | 0              | 1              | 0              | 0              | 6                   | 1                                | 4                   | 2                | 0               | 1              |
| <i>CsIPT7.1</i>                                                         | 14             | 0              | 1              | 0              | 1              | 2                   | 0                                | 3                   | 1                | 1               | 0              |
| <i>CsIPT7.2</i>                                                         | 14             | 3              | 2              | 0              | 0              | 0                   | 0                                | 5                   | 0                | 1               | 0              |
| <i>CsIPT9.1</i>                                                         | 15             | 4              | 0              | 0              | 0              | 0                   | 0                                | 1                   | 2                | 0               | 0              |
| <i>CsIPT9.2</i>                                                         | 17             | 3              | 1              | 0              | 0              | 0                   | 0                                | 1                   | 2                | 0               | 0              |
