# Supplementary material for: Genome-Wide Identification and Expression Analysis of Isopentenyl transferase Family Genes during Development and Resistance to Abiotic Stresses in Tea Plant (Camellia sinensis)
Source: MDPI journal article supplement (doi:10.3390/plants11172243), 2022-08-29
Supplement: s1 [file s1]

**Table S1** The amino acid sequence of IPT numbers from several species

>AtIPT1

MTELNFHLLPIISDRFTTTTTTSPSFSSSHSSSSSSLLSFTKRRRKHQPLVSSIRMEQSRSRNRK  
DKVVVILGATGAGKSRLSVDLATRFPSEIINSDKIQVYEGLEITTNQITLQDRRGVPHHLLG  
VINPEHGELTAGEFRSAASN VVKEITSRQKVPIIAGGSNSFVHALLAQRPKFDPFSSGSLI  
SSDLRYECCFIWVDVSETVLYEYLLRRVDEMMDSGMFEELSRFYDPVKSGLETRFGIRKAI  
GVPEFDGYFKEYPPEKKMIKWDALRKAAYDKAVDDIKRNTWTLAKRQVKKIEMLKDAG  
WEIERV DATASFKA VMMKSSSEKKWRENWEEQVLEPSVKIVKRHLVQN

>AtIPT2

MMMLNPSNGGIEGEKMKKKAKVVVIMGPTGSGKSKLAVDLASHFPVEIINADAMQIYSG  
LDVLTNKVTVDEQKGVPHHLLGTVSSDMEFTARDFRDFTVPLIEEIVSRNHIPVLVGGTHY  
YIQAVVSKFLDDAAEDTECCADVASVVDQDMVVESVFGRDDLSHGYELLKELDPVAA  
NRIHPNNHRKINQYLSLHASRGVLP SKLYQGKTAENWGCINASRFDYCLICMDAETA VLD  
RYVEQRVDAMVDAGLLDEVYDIYKPGADYTRGLRQSIGVREFEDFLKIHLS ETCAGHLTS  
LSNDDKVMKENLRKILNFPKDDKLRLMLEEAIDRVKLNTRRLRRQKRRVSRLETVFGWN  
IH YIDATEYILSKSEESWNAQVVKPASEIIRC FLETETESGRDPTSGKSIERDLWTQYVCEAC  
GNKILRGRHEWEHHKQGRTHRKRTRHKNSQTYKNREVQAEVN

>AtIPT3

MIMKISMAMCKQPLPPSPTLDFPPARFGPNMLTLNPYGPKDKVVVIMGATGTGKSRLSVDI  
ATRFRAEIINSDKIQVHQGLDIVTNKITSEESCGVPHHLLGVLPPEADLTAAANYCHMANLSI  
ESVLNRGKLP IIVGGSNSYVEALVDDKENKFRSRYDCCFLWVDVALPVLHGFV SERVDKM  
VESGMVEEVREFFDFSNSDYSRGIKKAIGFPEFDRFFRNEQFLNVEDREELLSKVLEEIKRN  
TFELACRQREKIERLRKVKKWSIQRV DATPVFTKRRSKMDANVAWERLVAGPSTDTVSRF  
LLDIASRRPLVEASTAVAAAMERELSRCLVA

>AtIPT4

MKCNDKMVVIMGATGSGKSSLSVDLALHFKA EIINSDKMQFYDGLKITTNQSTIEDRRGV  
PHHLLGELNPEAGEVTAAEFRVMAAE AISEITQRKKLPILAGGSNSYIHALLAKSYDPENY  
PFSDHKGSIKSELKYDCCFIWIDVDQSVLFEYLSRLDLMMKSGMFEIEAEFHRSKKAPKE  
PLGIWKAIGVQEFDDY LKMYKWDNDMDKWDPMRKEAYEKAVRAIKENTFQLTKDQITK  
INKLRNAGWDIKKVDATASFREAIRAAKEGEGVAEMQRKIWNKEVLEPCVKIVRSHLDQP  
INYYYYYFYLLKRFLSLN

>AtIPT5

MKPCMTALRQVIQPLSLNFQGNMVDVPFFRRKDKVVVFMGATGTGKSRLAIDLATRFPA  
EIVNSDKIQVYKGLDIVTNKVTPEESLGVP HLLGTVHDTYEDFTAEDFQREAIRAVESIV  
QRDRVPIIAGGSNSYIEALVNDCVDFRLRYNCCFLWVDVSRPVLHSFV SERVDKM VDMGL  
VDEVRRIFDPSSSDYSAGIRRAIGVPELDEF LRSEMRNYP AETTERLLETAIEKIKENTCLLA  
CRQLQKIQRLYKQWKWNMHRVDATEVFLRRGEEADEAWDNSVAHPSALAVEKFLSYSD  
DHHLEGANILLPEISAVPPLPA AVAAISR

>AtIPT6

MQQLMTLLSPPLSHSSLLPTVTTKFGSPRLVTTCMGHAGRKNIKDKVVLITGTTGTGKSRL  
SVDLATRFFPAEIINSDKMQIYKGFEIVTNLIPLHEQGGVPHHLLGQFHPQDGELTPAEFRSL  
ATLSISKLISSKKLPVVVGGNSFNHALLAERFDPDIDPFSPGSSSLSTICSDLRYKCCILWVDV  
LEPVLFQHL CNRVDQMIESGLVEQLAELYDPVVD SGRRLGVRKTIGVEEFDRYFRVYPKE  
MDKGIWDLARKAAYEETVKGMKERTCRLVKKQKEKIMKLIRGGWEIKRLDATAAIMAEL

NQSTAKGEGKNGREIWEKHIVDESVEIVKKFLLEV

>AtIPT7

MKFSISSLKQVQPILCFKNKLSKVVNSFLHPKEKVIFVMGATGSGKSRLAIDLATRFQGEI  
INSDKIQLYKGLDVLTKVTPKECRGVPHHLLGVFDSEAGNLTATQYSRLASQAISKLSAN  
NKLPIVAGGSNSYIEALVNHSSGFLNNYDCCFIWVDVSLPVLNSFVSKRVDRMMEAGLL  
EEVREVFNPKANYSVGIRRAIGVPELHEYLRNESLVDRAATSKMLDVAVKNIKKNTEILAC  
RQLKKIQR LHKKWKMSMHRVDATEVFLKRNVEEQDEAWENLVARPSERIVDKFYNNNN  
QLKNDDVEHCLAASYGGGSGSRAHNMI

>AtIPT8

MQNLTSTFVSPSMIPITSPRLRLPPRSVVPMTTVCMESYKQKVVVIMGATGSGKSCLSID  
LATRFSGEIVNSDKIQFYDGLKVTTNQMSILERCGVPHHLLGELPPDDSELTTFEFSRLASR  
SISEITARGNLPIIAGGSNSFIHALLVDRFDPKTYPFSSSETSISSGLRYECCFLWVDVSVSVLF  
EYLSKRVDQMMESGMFEELAGFYDPRYSGSAIRAHGIHKTIGIPEFDRIYFSLYPPERKQKM  
SEWDQARKGAYDEAVQEIKENTWRLAKKQIERIMKLKSSGWDIQRLDATPSFGRSSREIW  
DNTVLDESIVVVRFLVKDKV

>AtIPT9

MVIGSGVFLTRTCYLRLQPPSLVLRRRFCAATTACSVPLNGNKKKKSEKEKVIVISGPTGA  
GKSRLAMELAKRLNGEISADSQVYKGLDVGSAPSDSDRKVVP HHLIDILHPSQDYSV  
GQFYDDGRQATKDILNRGRVPIVTGGTGLYLRWFMYGKPDVPKPSPEVIAEAHDMVLGF  
QTEYNWDAAVELV NAGDPKASSLPRNDWYRLRRSLEILKSTGSPSSFRIPYDSFRVNLV  
APDADDLEDGSSADISIQNIETDLDYDFLCFFLSSPRVALYRSIDFRCEDMLSGPNGVLSEA  
RWLLDLGLLPNSNPATRAIGYRQVNSLFPAMEYLLQCRRYEGESSPREFYAFLNKFQTASR  
NFAKRQMTWFRCEPMYHWNASKPLDSILQCIYDAYESEAEEMVEIPESLRMSKDVRDSR  
EASELKGYSKRNHRHFVRREDCSSVLEWIRSEGCKSEASCVEAIA

>CsIPT2

LSGIGEREIEGESEMQEGVLVNPSSNGRGKHPKV VIMGATGSGKSRLAIDLALHFPLEI  
INADSMQVYQGLDVLTKVPLQDQKGVPHHLLGTISPNEFTAKDFRDSVIPLIDDILSRN  
RLPVIVGGTNYIYQALVSPFLDDSDVEDKDENGLSDLHGDKSDSEFEPGRENFCYSYDSLK  
DLDPVAANRIHPNDHRKINQYLSLYARFGVLPSKLLQEKAMENWGQADNFRYHCCFICVD  
ASLPVLDKYVEQRVDRMVDAGLLNEVYDIYNLNADYTRGLRQAIGVREFEDFLKAYLFQ  
VQNDNENHLVDASHFQMSAKKGDQMLKENMMTILNSSNEKERNLLLEDAIDKVKSNTR  
RLVRRQKRRLNRLNTLFGWNIHYVDATESLQCASDDSWAAHVVEPSAKIIRSYLSKDESL  
VPDSESRTGTEGLKLFQRDLWTQHVCACGNRVL RGAHEWEQHKQGRGHRKRICRLRK  
SGGFSFVE

>CsIPT3.1

MWWWRRRPPQYPPPPPSASSKREGGGDGSHRHREVAADFDRPCHPFGGDSEFRQNSSL  
RGTKHSDKQNHPEEQRGVPHHLLGLVNPNADFSASTFCDMASFAVRSISSRRKLP IIVGGS  
NSYIEALVDDGSHEFRSRYECCFLCVDVSIPVLHSFVSNRVDLMVEMGMVEEVRSFFDLS  
GNYSNGIRRAIGVPEFDRIYFRMEGFVNEQVRVRLQEVIREIKGNTRKLATRQLDKIYRL  
QNVKGWKLHRLDATDAFRKHGKEADEAWEHLVTGPSSVIVFWWVD

>CsIPT3.2

MGATGTGKSRLSIDLATRFPAEIVNSDKIQAYEGLNIVTNKITAEEQRGVPHHLLGLVNPNA  
DFSASTFCDMASFAVRSISSRRKLP IIVGGSNSYIEALVDDENHEFRSRYECCFLCVDVSIPV  
LHSFVSNRVDLMVEMGMVEEVRSFFDLSGDYSNGIRRAIGVPEFDRIYFRMEGFVNEQVR

VRMLQEVIKGNTRKLRQLDKIYRLQNVKGWKLHRLDATDAFRKHDKEAAEAW  
HLVTGPSSVIVSRFLHNLDNAAALRSPITMTAVMTGASV

>CsIPT5.1

MRISFSPACKQVAQPLVNFPAGGINDPFILRQRKKEKVVVVIGATGTGKSRLAIDLATRLPA  
EIINSDKMQVYKGLDIATNKVTDEECRSVPHHLLGIVDPNADFNATDFRHLALHACDSIVR  
RNGLPPIAGGSNSYIKALVSDDFEFRSKYDCCFLWVDVKLRVLHSFVSERVDRMVEAGLV  
DEVAMFDPNADYKVGIRRAIGVPEMDRFLRSESDPNVDSQTRARLLKQAIIEIKSNTRD  
LACRQRKNILSLQTQLGLGLGLDLGLGLGLGPEWSMLHRLDATEVFLRRGAAAAAEAW  
RLVAEPSTIIVDRFLHEKDDQQDFMAAIATPASISAAVAATTRNLRCSGRTGGRTLQIQVRL  
VKLRDVEDNCWVMGLVGTYYVLPVQVEEVYKSKSKLELNSMQSS

>CsIPT5.2

MGIYAEAQSPWTTIELSHDGTRLRLARLGFFVVTDMRISFSAAIKQAQPLVSFPPGILNMDPF  
MARPHSKDKVVVVVGATGTGKSRLSIDLATRFPAEIVNSDKMQVYKGLDIATNKVTDEER  
RGVPHHLLGVVDPNVEFTATDFCHHASLAVESIVRRDRLPIAGGSNSYIKALVIDDIEFQSK  
YDCCFLWVDVSLPVLHSFVSERVNRMVEIGLVDEIRGIFDPNADHTRGIRRAIGVPEMDQF  
LREPNVDDETKALMLKEAIEKIKSNTCKLACCQLENILRLQNQLEWSMHRLDATAFLK  
GGNSDGNNIWEKSVAGPSILLVDQFLYEEGFGAFLTSQLRFLWRQL

>CsIPT6.1

MGPTGSGKSRLSIDLATRCFPSEIINSDKMQVYRGLDITTNKIPMHDRLSVPHHLLGHLDPS  
QRPDLSPSDFRSAAAATISAIISFRRLPLVVGGGSNSFIYSLVANRFDPGSDVFRESHDPVCS  
ELRYDCCFIWVDVALPVLNQYLKRKRVDEMLDSGMFDELADYFEFDDEEASRGTRTGLRK  
AIGVPEFEPYFRRFGGGGAPKDDPLRRVAYEEAVRAIKDNTCQLAKRQVGKIQRLKSAGW  
DLKRLDATEAFRAAMEDGGSDSGKSDGLVFGVGGGQGREAFYLHSILSESLDLNMHSSS  
DGSACKVHPSLRTDGWQI

>CsIPT6.2

MYIYTAQLNTHPHYSITPHQHHPFKLLFKSIVPSFPPPNWAQKKYSTTVSRRKDHHHLQH  
LHVHLDQPPQKIVVIMGPTGSGKSRLSIDLATRFFPSEIINSDKMQVYRGLDITTNKIPMHD  
RLSVPHHLLGHLDPSQRPDLSPSDFRSAAAATISAIISFRRLPLVVGGGSNSFIYSLVANRFD  
GSDVFRESHDPVCSELRYDCCFIWVDVALPVLNQYLKRKRVDEMLDSGMFDELADYFEF  
DDEEASRGTRTGLRKAIGVPEFEPYFRRFGGGGAPKDDPLRRVVYEEAVRAIKDNTCQLA  
KRQVGKIQRLKSAGWDLKRLDATEAFRAAMEDGGSDSGKSSEIWGKQVLEPSMKIVKRK  
LEE

>CsIPT6.3

MYSSCLSSAQQHTHTHLLYSLSHHSSLMRLSFFPTSLLHYSHRLFLSLLLFPPTNTTN  
LVSTSSSAPRWSQMITTTRRHQQHQKKKKQKIVVIMGPTGSGKSKLSVDLATRFFPSEIINS  
DKIQVYSGLDITTNKIPMHDRRGVPHHLLGDFPPHSDLTSPAFRSAAASIAVSSRRNLPL  
IVGGGSNSFIYALAADRFPASDVFDHDPVCPDLRYDCCFLWVDVSMPVLNQYLSKRV  
DDMLDSGMFEELQEYFSDQHRRESNSAIRTGLRKAIGVPEFEPYFKKFHPRTNPKEPVR  
MAVYEEAVRAIKENTCQLAERQVGKIMRLRNAGWDLRRLDATEVIRAAMKKESCGSDSG  
ESWERQVVEPSVKIVKRFL

>CsIPT6.4

MGPTGSGKSTLSVDLATRFFPSEIINSDKIQVYRGLDITTNKIPMHDRRGVPHSAAFAISA  
VSSRRKDGCIIRGGSEGQGEHVSAGGEASGEDHAPEERRVGPPATRRHGGYQSGDEEGV  
MWVRFRELGETSGGTKREDCEAVFGGV

>CsIPT7.1

MSSMITQSFKNKVVFIMGATGTGKSRLSIDLATNFP AEIINSDKIQIYRGLNIVTNKITNLEC  
QEVPHHLLGEFDPDSDFRTARDFCHHALIAIEKIVRFGHIIVGGSNSFIEALVEDPDFKFRSQ  
YDCCFIWLDVSLPILHSFVSKRVDQMVDAGIVDEVRELFTPEVDYTRGIRRAIGVREMDR  
YFRVEPEIDNETKEMLLGVAIEEIKANTRKLVHTQLTKIHRLRDKL GWPLHRIDATCVFEK  
GGQEANHAWHEELVAKPSLEV VNEFLKENKNGVAVKNISSAFVNQRLNGLKVLN

>CsIPT7.2

MGSMSTQFLKNKVVFIMGATGTGKSRLSIDLATNFP AEIINSDKIQMYRGLDIVTNKITNLE  
RQRVPHHLLGEFDPDSDFRTARDFCYHALEAIENIIRSGRIPIIVGGSNSFIEALVEDPDFKFKS  
QYDCCFIWLDVSLPVLHSFVSKRVDQMVDAGLSWPFLLSNSTLYIFLDGLSDGLFGN

>CsIPT9.1

AGKSRLALELAKRLNGEIISADSVQVYRGLDVGSAKPSLSERKEVPHHLVDILHPSEGYSV  
GKFFEDARQATRDILNNGRVPIVTGGTGLYL RWYIYGKPDV PKASPEITSEVYSKLAHFQK  
DVDWDAAVQLVVKAGDPWAQSLPTNDWYRLRRSLEI IKASGSPPSAFQVPYDLFREQFDS  
SVTDCSLDNYSSGDAHEESES MNLDYEFICFFLSSQRLELYRLIDFRCEDMLS GSDGILSEA  
RWLLDIGLLPNSNSATRAIGYRQAMEYLLGCKQRGGSSEEFFAFLCE FQKASRNFAKRQL  
TWRFRNERIYHWIDASKPMDEV LNFIYDSYYNQNGSLTVPELSMEREISSRRKSELKGYRT  
KNRRFISKYDCSGVLDWIRRT EGENAAKLMSIHR

>CsIPT9.2

MVSGFRGLRACCFRFSHTAAIPLPIHSSALSFRRL FVTNCSASVAGKKEKVIVISGPTGAG  
KSRLALELAKRLNGEIISADSVQVYRGLDVGSAKPSLSERKEVPHHLVDILHPSEGYSVGK  
FFEDARQATRDILNNGRVPIVTGGTGLYL RWYIYGKPDV PKASPEITSEVYSKLAHFQKDV  
DWDAAVQLVVKAGDPWAQSLPTNDWEQFDSSVTDCSLDNYSSGDAHEESES MNLDYEFI  
CFFLSSQRLELYRLIDFRCEDMLS GSDGILSEARWLLDIGLLPNSNSATRAIGYRQKRSVEF  
VKMGNLVHEAPVKARNFAKRQLTWRFRNERIYHWIDASKPMDEV LNFIYDSYYNQNGSLT  
VPESLSMEREISSRRKSELKGYRTKNRRFISKYDCSGVLDWIRRT EVTIIMLSIQSSLRRST  
TGASSTHLLRRFYSSDSAPERKVAVLGAAGGIGQPLALLMKLNPLVSKLSLYDIAATPGVA  
ADISHINTRSEVNGYMGEDQLGKALEGCDIVIIPAGVPRKPGMNRDDL FNINAGIVKSLCT  
AIAKYCPHALVNMISNPVNSTVPIAAEVFKKAGTYDEKKLFGVTMLDVVRAKTFYAEKA  
KVPVEGVNVPVVGGHAGITILPLFSQATPQANNLSYEDIEALTKRTQDGGTEVVVAKAGM  
GSATLSMAYAGAI FADACLKGLNGVPDVVECSFVQSCITELPFFASKVRLGKNGVEEVLDL  
GPLSDYEKQGLESLKPELKSSIEKGIKFVTES

>IPTZ\_AGRT5

MLLHLIYGPTCSGKTDMAIQIAQETGWPVVALDRVQCCPQIATGSGRPLESELQSTRRIYL  
DSRPLTEGILDAESAHRRLIFEVDWRKSEGLILEGGSISLLNCMAKSPFWRS GFQWHVKR  
LRLGDSDAFLTRAKQ RVAEMFAIREDRPSLLEELAE LWNYPARPILEDIDGYRCAIRFARK  
HDLAISQLPNIDAGRHVELIEAIA NEYLEHALSQRDFPQWPEDGAGQPVC PVTLTRIR

>IPTZ\_AGRT7

MDLRLIFGPTCTGKTSTAVALAQQTGLPVLSLDRVQCCPQLSTGSGRPTVEELKGTSRLYL  
DDRPLVKGIIAAKQAHERLMGEVYN YEAHGGLILEGGSISLLKCM AQSSYWSADFRWHII  
RHELADEETFMNVAKARVKQMLRPAAGLSIIQELVDLWKEPRLRPILKEIDGYRYAMLFAS  
QNQITS DMLLQLDADMEDKLIHGIAQEYLIHARRQE QKFPRVNAAAYDGFEGHPFGMY

>MIAA.RHIRD

MMKNLDQNFDAILITGPTASGKSALALRLARERNGVVINADSMQVYDTLRVLTARPSDHE

MEGVPHRLYGHVPAGSAYSTGEWLRDISGLLSDLRGEGRFPVIVGGTGLYFKALTGGLSD  
MPAIPDDLREGLRARLIEEGA AKLHAELVSRDPSMAQMLQPGDGQRIVRALEVLEATGKSI  
RDFQRASGPMIIDPERAQKFIVLPERPVLHDRINRRFEAMMDSGAVEEVQALLALNLAPDA  
TAMKAIGVAQIADMLTGRMGAAEVIEKSAAATRQYAKRQMTWFRNQMGDDWTRIQP

>IPT\_RHIAD

MDLRLIFGPTCTGKTSTAIALAQQTGQPVLSDRVQCCPQLSTGSGRPTVEELKGTTRLYL  
DEQPLVKGIISAKQAHERLIAEVYNNEAHGGLILEGGSISLLKCMVQSSYWSNDFRWRIIR  
HKLADEETFMKAAKARVKQMLHPAAGLSIIELVHLWNQPQLRPILEGIDGYRYAMLFAS  
QNQITPDMILLQLGADMEDKLAHGIAQEYLIHARRQEQEFPSINAVAFEGFEGHPFGM

>IPT\_DICDI

MKILLIIGSTGVGKTDLSINYSKKYNAPVVVLDRIQCFPELSITSGRPDESEYFGSKRIYLT  
LLVEPGNENIKKTFYVNKLINILNEIKNNYDTQNL PNEKGYGCIFEGGSISLLKELLTKINKL  
PYKITCVIYIRPSDSIDNHKLYKAKIFKRVSQMLFPTEEGNDSQILEVKRILNKGKTVNAQG  
EINLEYEYKIKQVLISLVGLVGIEDVIHFLDKQYDQKNITSKLDPNYLNEIQSCLIETITLAH  
YNYALSQIELIDSLIKQLPKSIEYCLKNIEIN

>MIAA\_DICDIb

MTSPLVVVFLGTTGVGKSKLAIELAKQFNGEIISDSMQLYKDGGDITTNKV TIEEMEGIPH  
HMMSFLPIDTLNYNVADFASKALGIIRDILSRGKLPIVVGGTHYYTCSLLWSDSIISLDDND  
NNNNNNNNNNNNNNNNNNNNNNNNNNNNNNNNNNNNNNNNNNNNNDNNS ENKIIEEEEEII  
DKNKYSYEILKEIDPIMAEKLHKNDIRKIKRSLDIYYTSGKKQSDLINDQHDKKSLRFRSCLLWLE  
CKDQSILEYRLNKRVDNMIELGMLDEVFNIFKILNKSNTENFSKGLTQAIGIKELYDY YLFL  
NENENTKIENENKEIDNDNENNNNNNNNNNNKIKKIEKLKIKKEKQREKLYKESIDS IKSHTK  
RYAIRQIKWISKISPINTPLDILSLDSSNLDLWNDLVFIPSKNKVDQFINHLNLTGYKNKDST  
NNDNNNNNNNNNNNNNNNNNDLNKWKYYCEHCSKELNGDNEWSFHQSKQHRHRLKK  
RDTNNIDNKDKYNNNNKNNNNNNNIQKEKGEIETEK

>MIAA\_DICDIc1

MKRFFGSGGIKMKDKVIIIAGGTGIGKSDLSLKLAKQINGEIIGADSVQIYKHLTIASNKVT  
DTNGIPHLIDMLDLDDNNFCLFDYYRLAKNTIKDVLSRGRVPIVVGGCGFYLD TILKGSR  
VDLTNDKERDEIKLYYNKIKQEDNWDYYYDLLKKYDIESANMILKNDFIRLSKSLYFNTV  
KGVKFSTQKDDYQDSIANEYDFRTFYLSGDRSKMHITLNNRCESMFKMGILEEVYDLLKR  
DKDLHFKNSKSSESIGYRQIMDLLLPVVRNIDDT SINMNQSLNAIDESDVISTILNFQTAN  
RNY YRKQYSWFKKEKYFEWLNPIDNEITNQYIISLELPFDEWQNNRNLKKEEEIRTCSPK  
DTKLISLYKPSKQLVSSILLNSNKLRLNSLIKS NPELFENDNNNNKYK

>MIAA\_DICDIc2

MKRFFGSGGIKMKDKVIIIAGGTGIGKSDLSLKLAKQINGEIIGADSVQIYKHLTIASNKVT  
DTNGIPHLIDMLDLDDNNFCLFDYYRLAKNTIKDVLSRGRVPIVVGGCGFYLD TILKGSR  
VDLTNDKERDEIKLYYNKIKQEDNWDYYYDLLKKYDIESANMILKNDFIRLSKSLYFNTV  
KGVKFSTQKDDYQDSIANEYDFRTFYLSGDRSKMHITLNNRCESMFKMGILEEVYDLLKR  
DKDLHFKNSKSSESIGYRQIMDLLLPVVRNIDDT SINMNQSLNAIDESDVISTILNFQTAN  
RNY YRKQYSWFKKEKYFEWLNPIDNEITNQYIISLELPFDEWQNNRNLKKEEEIRTCSPK  
DTKLISLYKPSKQLVSSILLNSNKLRLNSLIKS NPELFENDNNNNKYK

>aVctIPT\_I

MPATSLFELQLQPQYAPQQQQQQQPSLSPPPPPPPPPQQQQQQHTQDEHEQE AAAAAAT  
ADNVPAEGSETAQR RPMVVIVTGPTAVGKTAISLMLATHLRQPTTTGHHNYQHQQEQQEQ

QQEQQQHQEQQQEQRHSDGNGAGYSATGIGCGAVDGAGGCSAAGGGGASSAGGEVIS  
ADSVQVYKGLDVGSDKLPSPERRGIPHHLLDVREPHQDFSAGEFFECARPVMEDIINRGGV  
PLVVGGTGLYLRLVVGKGGAPRATPEALKAVNEAIGAAWAEREAEKRAAAVAEATDAT  
AAAAAAAAGTAEVAAPDPFCLGEEEEKWDAAAALLLKWGDDVAYDRIRAERNYYRL  
ERALAILAMHPGAKLADFEPRAILDRELDLDFRCFFLHRPRLQLYDRIASRVEAMVVEGGL  
LEEAAMLLRMGLAPGANMAAKAIGYRQAMEWLMAAKAADRPVGLPDLCALHAAICQA  
THKLVRAQMTWFRDDPMYKWIDVEGRDPRDVVEEILQELAKPQHEAAAEEARGPAKKAK  
SKSALAAEAAAAAAAAAAEAQLAPLLARINGELLPGIPEAAVAAGAASATATSAAVSGGVR  
QEVGEVEE REAKRCRSGE

>alMptIPT\_I

RVLVLGPTAVGKTSLSLDLASKLDGEIISADSVQVYRGLDVGSGKLAASERRGIAHHALD  
VLDPSEDFNAGAFVDLALETVEDVVSRGKVPIVVGGTGMYLRWFVGGRPATPASTPESSR  
AAKEEVRAAAAAAGWDGALKLLRDAGDPDTADRVATNDWYRVERALEILRASGRPLGS  
YAPESPPPFDFRCVLLDAPRVQLYRRIDDRVECMVCDGMLDEAAMMMRRGIAPGSTSAA  
SAIGYRQAMEFLAARAAAAAGGGGGGATTEEDLLAFVEKTQRATRAFAKRQLTWFRGEP  
EGRYRWISASDGEEAAAREAMDAFERD

>alMptIPT\_P

MPSPTPRPAASPLPGVVCVLGQTGAGKSRLGAELARAIDGEVVNADAMQLHDALPIATAR  
TTSEQTLGVPHHLFGVVPVPVPTRGGESSASARDERGGGGYGVTVRDYRAMALPVVEGII  
ARGKVPVLVGGSDYYARAIVSRSLDDQLGAGREGPGAEARGEDDGDARDDGASASEEE  
EDGDDDDDDDDNVADAPPPSRVKPNENDAAAALARHARLREVDPVSAKLHPNNARKVR  
RYLEIYDAFGEPASVVFARGKAAAAAADDDDDDESPSDTSARYRSLCLVLRADASELEPA  
LARRVDAMVDAGLVAELEAAAAANVGGGVGVSQSIFHEWVEYLRARAATPQRDVDA  
IDTMKADAIEAMKADTRRLARAQLRRCRKLERTFGWRPTYLDATATHAGARVGDAARA  
DAAWREDVFEPALRAARAFVAGEDDGGGGGGGGVAEPAWEERRCDACERTLRGDAEW  
RAHVSGRRHRKRVASLRKKREGKHGVPPREKGCSDAG

> PpIPT1

MVSLQFEVGP MYMLTHRAQACLCNCTGGLKLFRGVSSLPNGGICLPKFFSYQCANWGTI  
GWNTSSVGDSSRDRVLC SKVGPRITL CDSYCAPNSKLGRVRS DGS LNNFVRAFVGETIAK  
TAGAVGSGKESAMAEDNVEDTDVRGRKGRVVIAGPTGVGKSRLALALAKRLRGEIISAD  
SVQVYRTL DVGSAKTPVDEREGIPHHLLIDIVDPSQDYTAGYFYDDARAATELVLTGKSVPI  
VVGGTGMYLRWYMTGKVGAPKATKEVFVAVEEEVDRLIKEGGGWDDALRMLADAGDL  
TTGPSLARNDWYRLRRALEIIKTSGQPRSAFSKLRNCDPDAATEGASWDYDFHCYFLYQP  
RSELYQKVDLRCEQMAQEGLLDEASSLLDSGLQPNSNSASRSIGYQLAMEFLMECRQVE  
GAATEERFFLFLEEFQRHSRNYVKRQLTWFRNKGQSEQMFNWIDATQPLEVMVDALAKE  
YERPNEVVSDVLKAASVVTKESSYKEENLLKRYRTQNRIFTSNSEALKRTLQWIRDTQCL  
WRNSSTVDDLQKRMESSTTSM

> PpIPT2

MSTTAVVHLHSAASAVTPLWSGAREPSAPEPAIVRPTVRCFNRSSGAARASFTGVDLGKCR  
AWRRGLTTPFRCVATPERRASSVGKAVSQDASRLQFPFSSLDYPDFNRTAFVEPDVSVRHH  
GDRSVVEKNPPSTKLVQAPRRSVKPRVILIAGPTAVGKTRLSIELAKTLGGEVINADSVQV  
YQGLDVGAAKASLEERQGIPHHVMDLVPPTVEYSYEQFLRDARSATEHILAKGLVPIVVG  
GTGMYMRWFMQNRAGITSHPFEDDLTGEFDARAEDDWDYDFQCYFLYQHRADLYPRV  
DIRCEQMIPALLEEAALLNLGVRPQTNSASKAIGYEEAMELLLEARQADGVISQERFLKF

VALFQHNSKGLVRKQIAWFRTHSRSEVRKFRWLQAGGPVEEMMEALVEEYARAPGQPTLI  
ASGEELKTRSMKEQKRMKSYKPTLKIYSDAAVAGCLAWIKSTQGPILSPARASGQCRQIL  
ARLLGVGTAAVDSRRLAETAPVSGRFLKLGMCFTTLSRRFSGSFGKVQTSRLRNCVASGR  
RDGGRQWNTHRCHILLQGRPVIATVLGMVPCSLEPLPQEVGIHVTGLHRLQFPSSNSVTH  
VLNVWDFLYPTLEALCQCIREWIDDRMSTAHEYICTFPSCSERGFSVTERRGDLKVFRSYNQ  
RRCDAQNHFFSELYNRALYTQITGVINNFISGIHTYISRRRRSVSRPLVDSFVGALQESHQK  
KGQVHVLVREQILFTAMIHVRQVAMHRVIIRKSDIKDALEPCGSGPEGPDTRHRVSTSTKR  
TQYRCRPCDSVLESSNQSNEADDLLNNLPILNLPILTSMLRPLALASDAGGCNHLVLRAAA  
FPTIPQHMFGQERVIGVMTSSLRWFAESHCSGKRSTENKLRTS

>PpIPT3

MSSTAAAVVASSISSDSARHEQHELQQKPQAQRCEVQTAQRIASQTRDRDSTGLAPVAA  
SPAAAVPVLAAAHESGREGQGMPPQLQRKWGVRGEPDKGKR DAGARHTVTYATAQESDR  
GVDRGGLRDWVPKKKYSATCGLQEHHWEDRFSSVERGGAERMELVVVRKAVAVGENG  
WSARLLTEAGGGASKLACLKFAGTLDKVDSRSSGKVTGLGTQKGRVVIAGPTAVGKSRV  
AIDLAKQLGGEIISADSIQVYQGLNVGSAKTPLHEREGIPHHLVDIVPPTEEYSASQFCKDA  
RDATKLVLDRGRVPIVVGGTCSYLWYMNKGKTGASYPSSQQVNAAIEGKIRRLVSHSRG  
WEFAVHMLAQAGDPDTAYNLARNDWHRFGQALQAILVPIFSSPLYQSQFSWIRKHQPPTG  
GTDLSVKIQVSGQSRGVFPSPHNYKLDHTDGSEWDCNYDFQCYFLYQQRAELYRWIDLR  
CEHMLVDPRGLLQEAAWLLDIGVMPDTSSASRGIGYQEVGFTYHPDHSSIRAMEFLVDCR  
RTGGNTTEERFLAFLSGFQHISRSLVKKQLKWFSDQHSQFHWIDASQPTDQILEALR  
KEYWRRPGYPSELKGS DAMKEASYKEGKTLKHYKAKNRIFTDSTVISPVLRSCAKVTRL  
TCQPPIGRSWPAGGWQAKEPVWPPCTKQNLHPCSDKTVSMQDTIQNKWNHAVDYFYDQ  
MMQS

>PpIPT4

MANMIAKPKLSQYNLGPQELPISFCDCYVKLQHSFKRRRTHQSKQPRERHADRQTERAR  
DICSFYLLRHPTKGFEEVRREYMWTQRAACPCLSSRRGELVVGINWQQQCKDFWDPKLV  
MVDLQPNVLGMARAKVAVGNGGRQAGLLKEGETTATTTTTTRKIGCLEFAGRPDNDVRS  
TTTMTGVETQKDRVIVAGPTGVGKSRFAINLAKQLGGEIISADSIQELLVDHNV DALCEGI  
PAPLWRSFHVAYSFQVLICPHFALRGIFEVAGSSCLAEHCMQLNMSFCYLLEGDSSPDSPVV  
AFETFHMNIASCLTELQVYNGMNVGSAKTPLHEREGVPHLLDIVPPTEGPYCIFLMVDSI  
SRNVLLYFEVV TAKPKKYSASRFFKDARDATELV LARGRVPIVVGGTCTYMRRYMSGKA  
LAPKATPEVSAVIEAEIRRLVSRPGDWEMAALRLTKASDPANAYSFARN DWYRLRRALEV  
TMRMHVSGQPRRAF PKQHNYTVDHMDGLEWDSYDFQCYFFYQHRKELYHCIDLRCEQ  
MIANPRGLLQEASWLLDLGLTPDSSSFSSRGIGYQETCVMILMANQAMEFLMECRKAGGR  
STEERFLAFLSAFQHVSRSLVKKQLAWFRSNKHSDVKQFHWIDASQPTDKILEALRKEYW  
RRPGYPSELSGSDDVKHAS YMEGKILRYEDFYEPIGNCNCFCGVGEADTRRPEFSTES

>PpIPT5

MWTQRAACPCLSSRSGESVAGGNLQQCKDLWTPKLG MVRRVELRQSKKL VVRACLAV  
GDESRQTQFLKEGVETNTRNVKCLEFAGGPDNLDGSPTKAFSRGTQKGRVVVIAGPTAVG  
KSRIAIALAKQLGGEIISADSIQVYKGMNVGSAKTPLIERQGVPHLLDMVCPTEEYSASR  
FLEDARAATDRVLDRGRVPIIVGGTCTYLRFWMNGNAGAPKATSEVGATIDGDIRRLIGRP  
GSWETAVHRLAQAGDLTTTNSLARNPTNANMLRRAIEV VTPWGAFHNLYTCMLNHMDG  
SEWDYDYDFQCYFLYQHRAELYHWIDLRCEQMLADPRGLLQEASWLLDLGLMPDSSSAS  
RGIGYQEKFSNMFLEDACCDSSILIAM EFLMECRKAGGMATEKRVLEFLSAFQHVSRSLV

KKQLTWFRSDQHSQFHWIDASQSTEKILEAMRKEYWRPPGYSELRGSDDRKHASY  
KEGKVLKYYKVENRIFTNSAAIANVLKWKQTQVDRRFQQNVVRF

>PpIPT6

MAHSQSYKHTEFAPIGHKLSSIHIRNTPITEGHELQGGASLKSTGKSKSAAFSTSSLERKSM  
LRESVTQHTGLLRVPSRKLRRQTSLVAAMCSSNNNNSTCAKCIQTSLSHLELFLQQNSRLR  
SLVQCCHVSQSYCWYVVC DKIVKREK CERARGNKKDLQPSLRTAISVRYSRSEVDEGNNE  
RKRWEEWWSCRERIGVESMVKKKVRLVVRANVTVEKSDKQVRLLTEAGGAAGTLGCLE  
LSGRDLTRSNGKVTS LGTQRGRVVVIAGPTAVGKSRVAIALAKQLRGEIISADSIQVYKGM  
NVGSAKTPLLREGVPHLLDMISPMEGTEYSASRFLKDARAATKMVLDSGHVPIVVG  
TCTYLHWYMNGEARAPKPSPKSNAANKERIERLVDRPGDWEFAVHTLAQAGDPATAYSL  
CRNDWPRLRRALEGILETQTVGWQSDQCMKVQISGQSGGVSTKPHNYTLDNMDIPEWD  
YDYDFQCYFLYQNRAELYRWIDLRCEQMIAEPQGLLQEASWLLDLGLLPNTSSASRGIGY  
QEAMEFLVECRGTGGITTEEKFLAFLSGFQHVSRLVKKQLRWFRSSHDSAVKQFHWIDA  
SQPTDQILEALRAEYLRRPGYSELKGSNALIDASYKEGKTLKYYDAKNRIFTSSSTIAPVL  
RWVKKQTQGDLRPIPRRFVTV

>ZmIPT1

MAHPSAAAAVSSTAPAA NPSSGAREEGGARSPSPSPSRGRAKVVIVMGATGAGKSRL  
AVDLAAHFAGVEVVSADSMQLYRGLDVLTKAPLHEQNGVPHLLSVIDPSVEFTCRDFR  
DRAVPIIQEIVDRGGLPVVVG GTNFYI QALVSPFLDDMAEEMQGCTLRDHIDDGLTDEDE  
GNGFERLKEIDPVAAQRIHPNDHRKIKRYLELYATTGALPSDLFQGEAAKKWGRPSNSRLD  
CCFLWVDADLQVLDSYVNKRVD CMMDGGLLDEVCSIYDADAVYTQGLRQAIGVREFDE  
FFRAYLPRKESGEGSCASLLGMHDDQLKSLLDEAVSQLKANTRRLVRRQRRRLHRLSKDF  
GWNLHRVDATEAFFCATDDSWQKKVVKPCVDVVRFLSDNSTVLPSTSASDPSSRELWT  
QYVCEACGNRVLRGAHEWEQHRQGRGHRKRVQRLKQKSLRPWPSLLPQDRS

>ZmIPT2

MEHGAVAGKPKVVFVLGATATGKSKLAIALAERFNGEVINADKIQVHDGVPIITNKVTEEE  
QGGVPHLLSVRHPDADFTAEEFRREAASAVARVLSAGRLPVVAGGSNTYIEALVEGDGA  
AFRAAHDLLFVWVDAEQELLEWYAALRVDEMVARGLVSEARA AFGGAGVDYNHGVRR  
AIGLPEMHAYLVAEREGVAGEAELAAMLERAVREIKDNTFRLARTQAEKIRRLSTLDGWD  
VRRIDVTPVFARKADGTECHELTWKKQVWEPCEEMVRAFLEPSLTAVPGVAVTEEGNAGV  
VATAAPAGDVVVPTGDVVTA VADA

>ZmIPT3a

MAAAAVAGIGSNDVPRKRLRRPSSVRIMERRSRGGSDGDCSCSSSGKELEPAEPTTRLVVI  
VGATGTGKTKLSIDA AVALGGEVVNADKIQLYAGLDVTTNKVPHADRRGVPHLLGAVR  
ADAGELPAPSYRALASAAAASVAARGRVPV VAGGSNSLVHALLADRLGDGDPFEADGGY  
RPSLRFPCCLLWVDVDGAALDDYLD RRVD DMVREGMVEELREYFASTSPAERASHAAGL  
GRAIGVPELGAHFAGRKTLAAAIDEIKVNTRVLAAAQVRKIRRMADAWGWPVRRLDATP  
TIRARLAGAGCAAEEAAWERDVGGPGLAAMRQFLDCHEQQQQQRWPLVRRQCRGMAW

>ZmIPT3b

MAAAAVAGIVSNDAPRKRRPPSGVRMEAMSRGGGCCSSSDKKLEAAEPATTRLVVIV  
GATGTGKTKLSIDA AVALGGEVVNADKIQLYAGLDVTTNKVPHADRRGVPHLLGAVRA  
DAGELPAPSYRALAAEAAAASVAARGRVPV VAGGSNSLIHALLAADSLGAGDPFKVDDGY  
RPSLRFPCCLLWVDVDGAVLDEYLD RRVD DMVREGMVEELREYFASAPPASHAAGLGKA  
IGVPELGAHFAGRKSLAAAIDEIKANTRVLAAAQVRKIRRMAGAWGWPVRRLDATPTVR



ARLAGAGRAAEAAAWERDVRGPGLAAMRQFLDGHEQQERWPLARRQCRGMVV

>ZmIPT4

MSLYLAPATAAAATTTTTTLPRQLLPASIDLRRLERRGMALPLPPAPAPPPPLVSANNRHAG  
AKHKAVVVMGATGTGKSRLAVDLALRFGGEVINSKIQHLHAGLDVTTNKVTEQERAGVP  
HHLLGVARPDEEFTAADFRREATRAARAITARGRLPIVAGGSNSYVEELVDGDRAAFDRDY  
DCCFLWVDVQRAVLHGCVARRVDEMRRARGLVDEVAAAFDPRRNDYSRGLWRAIGAPEL  
DAYLRWPGPGVDGDAESEGERDRLLAAAIEDIKSNTRRLSCRQRAKIQRLAKMWGVRRV  
DATEVFRRRGDEADEAWQRLVAAPCIDAVRSFLRTDDAAATVASDLAVDGVVPVFAPAPA  
AAVAG

>ZmIPT5

MAAPAMAAPPPPPACFPMPTRLTMPPTSITLPDPPPLSVGGACRRVAAKHKAVVVLGATGT  
GKSRLAIDLALRFGGEVINSKIQAHAGLDVATNKVGLAERGRVPHLLGVVHPDAEFTA  
ADFRREASRAADRAAARGRVPVIAGGSNSYVEELVEGDRAAFDRDYECCLWVDAQLPV  
LHGFVARRVDDMCRRGLVDEVAAAFDPRRTDYSRGIWRAIGVPELDAYLRARGRGHGH  
HDQMLAAALHEIKANTSRLAVRQRGKIQRLERMWRVRRVDATEVFLKRGLAADEAWQR  
LVAAPCIDAVRSFLLEDQQEYSSMGTAGAMLPAAVAAAAV

>ZmIPT6

MAAAPACSPMAARLTMPPLPDAAAPLSVVGCRVAAKHKAVVVLGATGTGKSRLAIDL  
ALRFGGEVINSKIQAYAGLDVATNKVGPAERAAPVPHLLGVVHPDAEFTAADFRREAAG  
AAARVASRGRVPIIAGGSNSYVEELVEGDRAAFRERYDCCFLWVDARLPVLHGFVARRVD  
EMCRRGLVDEVAAAFDPRRTDYSRGIWRAIGVPEMDAYLRAGGHGDGDGEQEQRARM  
LAAALDEIKVNTSRLALRQRGKIQRLEARMWRVRRVDATEVFLKRGHAADEAWQRLVAAP  
CIDAVRSFLLEEQEYSSSMVTASMFASAAAAV

>ZmIPT7

MAGVNGATASGGDNKAKVVLVMGATATGKSKLAIDLALRFGGEVNSDKIQVHDGLDV  
VTNKVTAAERQGVPHHLIDGVADADYTTADFCRDAVRVESILRGRVPIIAGGSNRYLE  
ALLDGEPPAGFRGRYECCFLWVDSDLAVLDYIGSRVDCMLEQGLVREVRFAFRHDDAD  
YSRGIRRAIGVPEMDMYFRMEAAGALDGDDDDQLRVRLAAAVNEIKANTCGLARRQL  
QKIHLRLHGLQGWSDIHRLDVTEVLQLKVGNAKNPKAQRDWETDVVSPAARIVGMFLA  
VEGARDKDKDRFLLTTPKEVAVPGICTATADWFGQQLDMTVMSPSKGFAGLGSAAAAV

>ZmIPT8

MAAAVAGARRPLHRTLHPPPPPEEDEHQQQRACRSRGSSSSCSASSSSTPARPRGTGMV  
VIVGATGTGKTKLSIDAAEAVGGEVVDNADKIQLYAGLDVTTNKVAPADRRGVPHLLGAI  
RPEAGELPPSTFRSLAAATAASIAARGRLPVVAGGSNSLIHALLADRLDAGAADPFSAPPQP  
APPRWGRRPALRSPCCLLWVHVDAALLAEYLDRRVDDMVRGGMVEELREYFAATTAAE  
RAAHAAGLGRAIGVPELGACFAGRASFRAAIDDIKANTRDLAAAQVRKIRRMADAWGW  
PIQRLDASATVRARLRGAGPDAESACWERDVRAPGLAAIRSFLLELDGGSVVDGAVVEEV  
EPRVRCCDVVG

>ZmIPT9

MLAPATAAVSAATATTTTLPRPPSSIDLRRLPLERGMALPLQPSLPPPLLLVSANNRHKAVV  
MGATGTGKSRLAVDLALQFGGEVINSKIQHLHAGLEVTTNKVTEERAGVPHLLGVVHP  
DVEFTAADFRREASRAAGAITARGRLPIIAGGSNSYVEELVDGDGRALREGYDCCFLWVD  
VQPAVLHGYVARRVDEMCARGLVDEVAAAFDPRRTDYSRGIWRAIGAPELDAYLRWSGD  
EGERARLLAAAIEDIKSNTRRLSCRQRAKIQRLAKLWGVRRVDATEVFRRRGDAADEAW

QRLVATPCIDAVRSFLRDAAVVAAANDPPAAEVVPVFAPASAAVVAG

>ZmIPT10

MSGEMRPQQLGAMRRAIWRSWPILCLQSQRHLLPSFCASTKAATMAASSLPPPTHKKK  
DTVIVISGPTGAGKSRLALEVARRLGGEIISADSVQVYRGLDVGSAKPSAAEMSLVPHHLI  
DILDTSDDYSGAFAFRDARRATQDVLDRGCVPIAGGTGLYLRWYIYGKPNVPQSSMEST  
LAVWSELADFRENGQWEEAVELVVQAGDPRARDLSVNNWNRLSRSLEIIRSSGSPPSAFA  
LPYDAFCEQHDTDLTEAPSSAGNYEAREMEYDFFCIFLASPRIELYRSIDLRCEEMLVDTGG  
LLSEASWLLDIGLQPRMNSASSAIGYKQAMEYLLHCRQNGGESTPQEFLDLAKFQRTSR  
NFAKRQLTWRNEKIYHWVDGSKPFEALVQFVCDAYHGCSARMVPESLEMKRENCVLKS  
RDLKTYRSMNRVFLGGDDCSHVLNWIRRTQSK

>BrIPT1\_1

MTELNFLPTISDHFTTTSTSLSFSSHSHFPFSVRMNDQSRPQNLKDKIVVILGATGAGKSRL  
SVDIATRLPSEIINSDKIQLYKGLEITTNQITIPDRRGVPHHLLGYLPSEDGELTARGFRIAAS  
NAVSDITSRKKLPPIAGGSNTLVHALLAERFDPKIDPFGSSSISRELRYNCCFIWVDVSETVL  
FEYLLKRVDDMMGSGMFEELSRFYDPVKASTTRVGIRKAIGVPEFDGYFKMYPPEKEGE  
WDSGRRAAYDKVVEEIKENTLRLAKRQVVKIEKL RDAGWDIKRVDATASFRAVLMGRRR  
REWRGIWEEQVLEPSVKIVNRLLED

>BrIPT1\_2

MTELNFLPTISDRFTTTSPSPSFSSHLLPFTHRRTRQSNHRPVSVRMEQSRPRNRKDKIVVI  
LGATGAGKSRLSVDLATRFPSEIINSDKIQVYEGLEITTNQITFPDRRGVPHHLLGYLPSEDG  
ELTAGDFRADASNAVSDIISRKKLPPIAGGSNSFVHALLAERFDPKIDPFASSICRDLRYDSC  
FIWVDVSEPVLFYLLKRVDEMGMGSGMFEELSGFYDPVKASRARFGIRKAIGVPEFDGYF  
KMYPPEKEIKWDSGRRAAYDKAVEDIKENT  
LRLARRQVWKIEKLREAGWDIKRVDATASFRAVMMSSSSSREWREIWEEQVLEPSVKIVN  
RLLED

>BrIPT2

MSVNPSNGGIDEAKKKKAKVVVIMGPTGSGKSKLAVDLASHFPVEIINADAMQIYSGLDV  
LTNKVTVNEQKGVTHHLLGTVSPDLEFTAKDFRDSTIPLIEEILSRNHVPVLVGGTNYIQA  
LVSKFLLED SKEDVDECCSNVAPGLDVESISGRDDL SHGYDLLKELDPVAANRVHPNNHR  
KINQYLSLHASRGVLP SKLYQENAAENWGCIDASSRFDYCLICMDAETT VLDEYVGQRVD  
SMVDAGLLDEVYDIYKPGADYTRGLRQSIGVREFENFLKTYLPDTNTSANDKALKENLR  
KILDFPKDDKLRVMLEE AIDSVKLNTRRLRRQKRRINRLETVFGWNIHHVDATECLLGK  
SEESWDVQVVKPATQILQSFLKTETELSHDSTLRKSMERDLWSQYVCEACGNKVLGRH  
EWDHHTQGRVHRKRTARFKKAQNFENREKQEEEEVGICRETS

>BrIPT3\_1

MIMRISMAMCKQPLAPSTALNFPPANFGPNMLTLSPSGPKDKVVVIMGATGTGKSRLSVDI  
ATRFPAEIINSDKIQVHQGLDIVTNKITTEESCGVPHHLLGVLPPEADLTAVNFRHMANLSV  
ESILSRGKLPPIVGGSNSYVEALVDDDEDYKFRSRYDCCFLWVDVALPVLHGVSNERVDKM  
VANGMVEEVRDFDYSDSNYSRGIKKAIGVPEFDMFFRNEPFLNTGDREELLSKVVD EIK  
RNTFGLACKQRNKIERLRKIKKWC IQRLDTPVFTRRRSKVDADVAWERLVAGPSTDAVS  
RFLDFTSPQPLVEALTAVAREREMSRCLVV

>BrIPT3\_2

MIMKISMAMCKQSLPPSTNLEFSPARFGPNMLTLNPYVPKEKVVVIMGATGTGKSRLSVD  
LATRFQAEIINSDKIQVHQGLDIVTNKITTEERC VPHHLLSVLPPQADLTAANFCHMANLS

VESVLNRGKLPPIVGGSNSYVEALVDDDDYKFRSKYDCCFLWVDVALPVLNRFVSERVDK  
MVQNGMVVEEARDFFDYSDSDYSRGIKKAIGVPEFDIFFRNEPFLNLGDREALLNKVVEI  
KSNTFKLACRQREKIERLRKIKKWCIQRLDATPVITRRRSKVDADVAVWERLVARPSTEAVS  
RFLLDIDSPRMFVEASTGAVREREMSLVA

>BrIPT5\_1

MKPCMTNLRQMIQPMLNFQGISAGLNMVDVPFFRPKDKVVFVMGATGTGKSRLAIDLAT  
RFPAEIVNSDK

IQVYKGLDIVTNKVTPEESLGVPHLLGTVENTHEDFTAEDYQREALRAVKSIVERDRVPII  
AGGSNSYIEALVNNCVDLRLRYKCCFLWVDVDRPVLNSFVSDRVDKMMVEMGLVDEVRI  
FDPSSSDYSSGIRRAIGVPELDEFLRAEKRDYPAEVTGKLLTAIKKIKENNCLLACRQYQK  
IKRLYKQWKWNMHRVDATEVFLRRGEEADEAWESMVARPSALAVDRFLNYSDDHHLEG  
ADILLPEISAVPPLPAVA AISR

>BrIPT5\_2

MKPCMTALRQAIPLLNFKEISTGLNMVDVPFFRRKDKVVFVMGATGTGKSRLSIDLATR  
FPAEIVNSDKIQVYKGLDIVTNKVTPEENLGVPHLLGTVENTHEDFTAEDFQQEAIRAVK  
SIVERDRVPIIAGGSNSYIEALVNNCVDLRLRYNCCFLWVDVDPVLHSFVSDRVDKMMVE  
MGLVDEVRIIDPTSDDYSTGIRRAIGVPELDEFLRAELLYPTSKLLETAIKKIKDSNCLL  
ASRQYQKIQRLYKQWKWNMHRVDATEVFLRRGEEADDAWEDKVARPSALAVDRFLKYS  
EDHHLEGADILLPEISVPPFPAVA AISR

>BrIPT7\_1

MKFSISAMKQVQPILSFKNKLSMVNVNSFLRPQEKVVFVMGATGSGKSRLAIDLATRFQT  
EIINSDKIQVYKGLDVLTNKVTPQECRGVPHLLGVFDSEAGNLTATDFCRLASQEISTLSA  
NNKLPIVAGGSNSYIEALANHSSGFLNKYQCCFIWVDVSLPVLNSFVSKRVDMMMEAGL  
LEEVRVHDPKADYSVGIRRAIGVPELHEYLCEYSLVDRGTQRKMLDAAVKKIKENTEIL  
ACRQLLKIQRLSKKWKLSMHRVDATEVFLKRNEEEADEAWENLVARQTKRIVDKFCDNQ  
VMKNDDVEHCLTSIGAASYGGGSGSRAHNMV

>BrIPT7\_2

MKFSISAPKQVQPILSFKNKPSIVNVNSFLHPREKVVVFVMGATGSGKSRLAIDLATRFQTEI  
NSDKIQVYKGLDVLTNKVTPQECRGVPHLLGVFDSEAGNLTATDFTLLASQEISTLSANN  
KLPIVAGGSNSYIEALANHSSGFLNNYECCFIWVDVSLPVLNSFVSKRVDMMMEAGLLD  
EVRQVYDPKADYSVGIRRAIGVPELHEYLRYESLVDRATQRKMLDVAVKKIKQNTAILAC  
RQLQKIQRLSKKWKSCMHVDATEVFLKHNEEEADEAWENLVARPTKRIVDKFSNRHVM  
KNDSVEHCLTTIGAASYGGGSGSRAHNM

>BrIPT8\_1

MQALTSFFVSRSLVPTTPRRPRVRPLSVPPMTVCIDQSRNEKVVVIMGSTGTGKSRLSVDL  
ATRFSAEIINSDKMQFYKGLEITTNQITIPERCGVPHLLGELPVDGPELTASEFRSLASGFIS  
EMTSRGKLPPIAGGSNSFIHALLVEHFDPETNPFSKTLIPTELRYDCCFLWVDVSVSVLYHY  
LSKRVDQMMESGMFEELADFYNSRDSRSTTRTGIHKSIGVPEFDRYFGVYPPEKNDKVCG  
WDPARKVAYEEAVQEIKENTWRLSKKQIDRIMKLRSSGWEIHRLDATASFRAQSREAWDK  
NVLEKSVKIVKRFVLEN

>BrIPT8\_2

MQELTSTFVSRSLVPTTYTRPPQLRPKSIVPMTVCMDQSRKEKVVVIMGATGTGKSRLSV  
GLAARFSGEIINSDKMQFYNGLEIATNQITIPERCGVAHHLLGELPVDDSELTASEFRSVASR  
SISEISSRGKLPPIAGGSNSFVHALLVDRFDPVTNPFSKPSISSELRYDCFFLLVDVSASVLY

HYLSKRVDQMMESGMFEELASFYNPRNSRSTIRTGIHQAIGVPEFDRYFGVYPPEKSHNVF  
EWDQARKAAEYEEVVHEIKDNTWRLAKKQIERIMMLRSSGWEIHRLDATASLRASSREVW  
ENKVLRESVKNVKRFLKLD

>BrIPT9\_1

MLSSSSVFLTARTCCLRLQPPCLILRRRLCGATACSVSLNGNTSNKKRNSEKEKVIVISGPT  
GAGKSRLALELAKRLNGEIIADS SVQVYKGLDVGSAKPSASDRKEVPHHLIDILHPSQDYS  
VGQFFEDGRQATKDILSRGRVPIVTGGTGLYLRFWFIYGKPDV PKPSPEIISEVHDILLDFQTD  
HNWDAAVEFVVNAGDQKASSLARNDWYRLKRSLEILKSTGSPSSFRVPYDSFRENLNSP  
DANDDFSENDISIQNIETDLDYDFLCFFLSSPRIDLRSIDFRCEDMLSGPNGVLSEARWLL  
DLGLLPNTSSATRAIGYRQAMEYLSKCRQQGGVSSPGEFYWFLNKFQQVSRNFAKRQMT  
WFRCEPMYHWNASKPLDTILEFIYDAYEKEAETLVVPDSIRMNKEMRNSREANALKAY  
RPRNRHFVGREDCSSVLEWIRNEGCKSDVSCMEGAAI

>BrIPT9\_2

MVIIHSGVALTRTCSSRLQPPCLVLRRRFSGAATTCVSLNGNSEKEKVIVISGPTGAGKSK  
LALELAKRLNGEIIADS SVQVYKGLDVGSAKPSASDRKEVPHHLIDILHPSQDYSVGQFFE  
DGRQATKDILSRGRVPIVTGGTGLYLRFWFIYGKPDLPKPSPEIVSEVHDMIDLDFQTDYNWD  
GAVEFVVNAGDQKASSLPRNDWYRLRRSLEILKSTGSPSSFRVPYDSFRENLN SHDANN  
DFDENGSSADISIQNIETDLDYDFLCFFLSSPRVDLYRSIDFRCEDMLSGANGVLTEARWLL  
DLGLLPNTSSATRAIGYRQAMEYLSKCRQRGVSSPGEFYGFLNKFQQASRNFAKRQMT  
WFRCEPMYHWNASRPLDTILEFIYDAYEKEGETLVVPDSL RMNKDLRNSREANALKGY  
RPRNRHFVGREDCSSVLEWISSEGCKSEVSCVEGTTT

>SIIPT1

MRSFFHIIHCKNFKFLRNNLCPSYVSYNIATTTVAPLTTT KKIVVIMGATGSGKSKLSIDLAT  
RGFNSEIINSDKIQVSKGLDITTNKISINEQSGVVHLLGEFSGPELFS P SDFRHTADNRITDII  
NRRRLPLIVGGSNSFIYALLSNQFNPGVDVFDEINPVQCISKELRYHCCFILVDVLTPVLNRY  
LFQRVDEMMNSGMYEELEEFFAKNGFSDRNTGIRKAIGVPEMEGYFRNLKNCTTVQEK C  
RLYEAALREIKENTKELAEKQIRKIQRLRESGWDLQKVDATEALRAKMTPGNSKIPATEIW  
ERQVVLPSMKIVKQFLLE

>SIIPT2

MRKLSFLSSANHSNTLFFF PKWTRNVVISATSSNPRLQRSKKIVVIMGATGCGKSKLSIEL  
ATHFFPSIEVINSDKIQVYNGLDITTNKISMNERCGIVHLLGEFKSTESQPEFTPSDFRSAG  
DFRINEIVNRGKIPFIVGGSNSFIYALLVKRFD SRF DIFESLNPVSEELRYQCCFIWVDAIAPV  
LNQYLDKRVD EMLDSEMFEELKEYFEKEGFS DSGDGIRKAIGVPEFEKYFKGKISYEEAA  
MEIKENTRVL AERQVKKIMRLREGGWNIQRVDATETLTAKMVSEKMAGGENPAGKIWEE  
EVLKPSAKIVKQFLLE

>SIIPT3

MNIVLQHIAPFVTCKHQLLINFRDSL TIDPFIPPRRKDKVVIVMGATGTGKSRLSIDLAKQFS  
AEVVNSDKMQIYEGLDIVTNKVTDKETCGIPHLLSIIDPNEVFTATDFCQRASKAVDSIIS  
KGQLPIIAGGSNSYIKALVNDDIEFKSRYECCFLWIDVNLKILQKFVSERVDKMVKEGLVD  
EAREFFNP DGYTSGIRRAIGVPEMHQYFINENNKMINENTRDKMLQIAIENIKVNTCKLA  
CCQRQNILRLESQLEWKINRLDATEAFEKKDGEAHQAWNRIVYERSTQIVRHFRGEKLLNI  
PPPPPPSSSTSFLHKVATMTH

>SIIPT4

MIGMMNSAQMCKQVRWQNLLQLQNFLQKDKVVVVVMGVTGAGKSKLSIDLATQFDGEII

NSDKIQVYKGLDIATNKITEEERCGVPHHCLGVIDPYKEFTTKNFCNMASTVNSITNRGK  
LPIIVGGSNSFIEAFVHNSNSYNFSTRYDFCFLWVDASMNVLNSFLYERVDKMVDQGMVD  
EVRQIFNPKNMDYTKGIRKAIGVPEFDSYFRAELSNSVDQRQTLERMLEEATEIKINNCILA  
SKQLEKIKRLISVKGWKIHRLDASEVFKKQRIAEKEAEIWKNMVMGQSRKIVHKFLYE  
NYRNSMVYKTDGTAIMAAASHY

>SIIPT5

MEIVEKLQNPNNNGGEIKLNPTSNSKPKVVVIMGATGSGKSKLAIDLASHFPIEINADSMQV  
YQGLDVLTKNVTPQEQKGVPHHLLGTISPCVEFTAKDFRDSTISIINEIWLNRNLPVIVGGT  
NYYIQALVSPFLDDSVEDAEANCLSDFQEDEKPDLEVELINEDYDCAYNRLKDIDPVAAN  
RIHPNNGRKINQYLNLYARFGVIPSKLLQEKTEGRTGVKLIQDMIFASYA

>SIIPT6

MLLGADGILSEARWLLDVGLLPNSNSATRAIGYRQAMEYLLRCREDGGWSSAGDFHDFL  
SEFQKESRNFQKMTWFRNEQIYEWIDASKPLEKVLSFICDSYNSQDGHLMPESLRMR  
KDIRNHRQA AVLKTYRTINRHFHGHEDCVDVLDWIKKIYGQPTDSL

>OsIPT1

MEHCNGIAAVGRWLSTKPKVIFVLGATATGKSKLAIRLAARFDGEVINSDKIQAHGDFPVI  
TNKVTDEERAGVAHLLGGVSPDADFTAEDFRREAAVAVARVHAAGRLPVVAGGSNIYVE  
ALVAGGGGAFLAAYDCLFLWTDVAPDLLRWYTAARVDDMVRRGLVGEARAGFDAGAD  
YTRGVRRRAIGLPEMHGYLLAEREGGAGAEDDDLLAGMLEAAVREIKDNTFRLTVSQVA  
KIRRLSALPGWDVRRVDATAVVARMAEGAPHGETWREVWVWEPCEEMVSRFLETAAAAA  
VVANGKVDVNVGDAAAGVPEAAAAAVVAAGVV

>OsIPT2

MEYHVGGVIGQSPKPKVVFLGATATGKSKLAISIAERFGGEVINSDKIQVHDGFPIITNKV  
TEEERAGVPHHLLGVLHPDADFTAEDFRREAAAVARVLAAGRLPVVAGGSNTYVEALV  
EGGGGAFFRAHDCLFLWTDVAPGLLRWYTAARVDDMVRRGLVGEARAGFVDGAGAAD  
YYTRGVRRRAIGIPEMHGYLLAERSGGEAADDGELAAMLGDGAVREIKANTYRLAATQVAK  
IRRLSALDGWDVRRVDATVVVARMAEGAPHRETWEAVVWKPCEEMVGRFLEASAAVDD  
DDNAAAGSPAALAPMTAACRLRAQLVQLQY

>OsIPT3

MEGSRGDKGKVVVVMGATATGKSKLAIDLALRFGGEVINSDKIQVHDGLDVVTNKVTDE  
ERAGVPHHLIGGVPPDADYGVDDFRDDAARAVASVLAGRVPVIAGGSNRYLEALLDGE  
GGSFRERHELCLFLWVDSRAPALHRYVRHRVDRMVEQGLVGEVRGLFRLDDADYSRGIRR  
SIGVPEMDAYLRQEATGALLTHGDKYKVALLASAVGEIKANTWSLARRQLRKIHRRLGLP  
GWSLRRLDVTRVLELKVEARSEAECAAWEADVIPAAREVGMFLHGGGNVVESGREE  
QPVVVEKMEVAAGGAGAAAAAEKWCGRRLLETTAAYHGMEAAAAV

>OsIPT4

MQAYMAVAAAPAPPASLTLLPRTTTVIRDRERFDAAVPVAPLVLRHGAGVKHKAVVVMGA  
TGTGKSRLAVDLALRFGGEVINSKMQIHSGLDVVTNKVTEEECAGVPHHLISVARPDDE  
FTAADFRREAAAAAGAVRGRLLPIIAGGSNSYVEELVEGDGRAFRERYECCFLWVDVDL  
EVLRGFVARRVDEMCRRLVREVAFAFDPRRTDYSRGIWRAIGVPELDAYLRSRGDGADE  
EERARMLAAVAEIKLNTFRLACRQHRKIERLDRMWRARRVDATEVFRRRGHAADDAW  
QRLVAAPCIDAVRSFLFEDQERSIAAGKPPLFAAGKATSGNISVFASAAAAAMAAAAAI

>OsIPT5

MATSLSLAPKPAVAVAAAAIPRLVPPPSIDMSALSPPPPLVSVSRSMVAKHKAVVVMGATG

TGKTRLAVDLALQFGGEVINADKLQLHRGLDVATNKATADERAGVPHHLIGVAHPDEEFT  
AADFRRAASRAAAVAARGALPIIAGGSNSYIEELVDGDRRAFRDRYDCCFLWVDVQLPV  
LHGFVGRVDDMCGRGMVAEIEAAFDPDRTDYSRGVWRAIGVPELDAYLRSCAAAGGEE  
ERARLLANAIEDIKANTRWLSCRQRAKIVRLDRLWRIRRVDATEAFRRRGGAANEAWERH  
VAAPSIDTVRSFLHGEFTTAAETTAAPVPPPPFLPMFALAAAGAGV

>OsIPT6

MLNFHPSCDCFLNMLGNKLVVIIGATGTGKTRLSIEIAKAIGGEVVNADKMQUIYDGLDITT  
NKVSLQDRCGISHHLIASIPRNAGDFVPSFFRSAAKTTINCIARRGHTPIVVGGSNSLIHGLL  
VDNFDSSIVDPFGQLEVSYPRTPRSQCCFLWVHVNEVILNEYLKHRVDDMVDAGLVEEIE  
EYFDTLNVNGHVPYVGLGKTIGVPELSEYFTGRVSCSDALSMKTNTQILARSQVTKIHR  
MVDVWGWVHALDCTETILAHLTGSNKYMEDLVWKRVDSDPGLATIQDFL

>OsIPT7

MTSVATRIATLVRAAAAASRPLRLHRRPGGEDTRMVVIVGATGTGKTKLSIDAAKVIGGE  
VVNADKIQLYDGLDVTTNKVSLADRRGVPHLLGAIRPEAGELPPSSFRSLAAATAASIAA  
RRLVPVIAGGSNSLIHALLADHFDASAGDPFSPAAAFRHYRPALRFPCCLLWVHVDEALLD  
EYLDRRVDDMVDAGMVEELREYFATTAAERAHSGLGKAIGVPELGDYFAGRKTFSEAI  
DDIKANTRVLAQAQVSKIRRMADVGWPIHRLDASDTRARLTRAGSAAESASWERDVR  
GPGLATIRSFLADQSPPPRSEGTNDYLYAMETEPEPPPPPTLPPRLRLPRMQYCDMVG

>OsIPT8

MERSRVGDGCCCSCSGRGGVASTTAVRPSTGMVVIVGATGTGKTKLSIDAAQELAGEVVN  
ADKIQLYDGLDVTTNKVSLADRRGVPHLLGAIRAEAGELPPSSFRSLAAAAAAGIASRG  
RVPVAVAGGSNSLIHALLADPIDAAPRDPFADADVGYRPALRFPCCLLWVDVDDDLDEYL  
DRRVDDMVGEGMVEELEEFATTSASERASHAGLGKAIGVPELGDYFAGRKSLDAAIDEI  
KANTRVLAARQVGKIRRMADVWGWPIRRLDATATIRARLSGAGRAAEAAAWERDVRGP  
GLAAMRQFVGRADFNAAVDQLAARSRRQCLRGGMVAG

>OsIPT9

MAHLAASAAPLPSADPDAGEESSHSPPPPEKGLRKVVVVMGATGAGKSRLAVDLASHFA  
GVEVVSADSMQVYGGLDVLTNKVPLHEQKGVPHLLSVIDPSVEFTCRDFRDHAVPIIEGI  
LDRGGLPVIVGGTNFYIQAQVSPFLFDDMAQDIEGLTLNDHLDEIGLDNDDEAGLYEHLKK  
IDPVAQAQRIHPNNHRKIKRYLELYESTGALPSDLFQGGQATEKWGRPSNSRFDCCFLWLAD  
LHVLDRYVNERVDCMIDDGLLDEVCNIDREATYTQGLRQAIGVHEFDEFRRFYFARKET  
GEIKMDSCTTMAGLHDDNLKGLLDEAVSQLKANTRRLVRRQRRRLHRLNKYFEWNLRHI  
DATEAFYGATADSWNMKVVKPCVDIVRDFLSDDTILASRDGSSVTGSPRMSSRELWTQY  
VCEACDNRVLRGTHEWEQHKQGRCHRKRVRQLKQKASTVISL

>OsIPT10

MQYGCRRAVWKRSPAAAAATKNKVIVISGPTGAGKTRLALDLAKRLSGEISADSVQ  
VYRGLDVGSAPSSSDRAAVPHHLIDILHASDDYSAGDFFHDARAATDHLLARARVPIVA  
GGTGLYLRWYIYGKPSVPQSSMDVTSVWSELSRFRDTGRWEEAVDLVANAGDPKARDL  
SVNNWSRLRRSLEIIRSSGSPPSAFSLPYNAYNLNHHRRRLSLTNQADQPTELELDYDFLCIF  
LACPRVELYRSIDLRCEEMLADTGGLLSEASWLLDIGLSPGMNSATCAIGYRQAMEYLLQ  
CRHNGGSSSPQEFLEFLTKFQTASRNFSKRQMTWFRNEKIYQVVDASQPFDAIAQFICDAY  
HDRAARLVPSLEMKRESRHSRDLKTYRSENRVFRGDDDCCHVLDWITRTQRK

>PtIPT2

MESDSAEEEEALQNPSNTDGGKELTVTKKEEKEEKPKLVVIMGPTGSGKSKLAIDLAAHFP  
VEIINADSMQVYRGLDVLTNKVPISDQEGVPHHLLGTLNPNVEFTAKDFRDSAIPVLSIGK  
CRYLLKCCVVFQFIMVFIIATNNAINGFMLINEILSRNCLPVVVGGTNYIYQALVSPFLDD  
TTNDLDESLLNHPSGDEQTDHATDSGRESFNHSYDYLRELDPAANRLHPNNHRKINQYL  
NLYARSGILPSKLYQGKAAEIFYTRIELCNYFEAVVILEKRMFWQNWGCMDNYRFHCCFIC  
VDADIPVLDRYVEQVRVDSMIDAGLLGEVCEVYNYNADYTRGLRQAIGVREFDNFLRVYM  
SDEKGHDSMGSFLQSKNEDVKLLKDNMREILHSSDDNQLKILLAEADKVKANTRRLVR  
VQKRRLTRLQTFFGWNIHYVDATEFISCKSDELWAGQVVSANVIRAFLEERCAPDLE  
THVGGGMKSVERNLTQYICKACGNRVLRGAEHEWEQHKQGRGHRKRISRLRKSQGHYS  
SLVEQEVISNSS

>PtIPT3

MMNLCKSLCPQTSRMLDIPPGMLKMDMLSPRSRQKEKVIVIMGPTGTGKSRLSIELATQF  
PAEINSDKMQVYKGLDIVTNKVAEEEEKSGVPHHLLGIANPTVDFTATNYCHTASLAVESIS  
TRGLLPPIVGGSNSYIEALMDDEDLRLRLNYDCCFLWVDVSMPLVHKFVSRRVEQMVSVG  
MIDEVRNIFDPYADYSTGIRRSIGVPEFDKYFRAEAFLEENRARLLHEAICHVKKNTCKL  
ACRQWEKINRLRKIKGWDIHRLDATFVQKSGKEAEHAWEMLVARPSTAIVGQLLCGVPA  
DKVPAIASVAKNMGYIRQCLVA

>PtIPT5a

MTMRLSLSAYKQVQPRVNFQGGNLMKPFRRKDKVVFVLGPTGTGKSRLAIDLATHFPA  
EVVNCDKMQVYKGLDIVTNKVTEEEECRGVPHHLLGIADPNADFTSDDFRHHASLVVESIV  
TRDRLPIIAGGSNSYIEALANDDPEFRLRYECCFLWVDVSLPLLHSFVSDRVDVMVRAGLI  
DEVVDVFDPTKFDDYSQGIKRAIGVPELDQFLRNETIVDAKTRRKLLDEAIEKIKENTCML  
ARRQLQKIRRLHSIWNWKMHRIDATPVFLASGKEADNLWDQIVAGPSTMIVNQFLCEENH  
VSPIVPSESINMVPISVPAMAAVASR

>PtIPT5b

MTMRLSLTAYKQVQPRGNFQGGNLMKPFRRKDKVVFVVGPTGTGKSRLAIDLATRFPA  
EVVNCDKMQVYKGLDIVTNKVTEEEECRGVPHHLLGIADPNANFTSDDFRHHASLVVESIV  
TRDRLPIIAGGSNSYIEALANDDPEFRLRYECCFLWVDVSLPILYSFVSERVDVMVEAGLID  
EVRDMFDPNKFDDYSQGIKRAIGVPELDHFLRNEAIVDAKTRRKLLDEAIDKIKENTCML  
ASRQLQKIHRRLHSIWNWNVHRIDATPVFLTSGKEVDNLWDKLVAGPSTMIVNQFLCDKNY  
ASPIIPSESIKMEPISVPALAVGATR

>PtIPT6a

MKIPFPKSTNQPLYTALKTQPLHPINISIPFNKPRPPPIAVRMDTDSSTTTSTAVYRHKKDKIL  
VIMGATGCGKTRVSIDLATRFQSEIINSDKMQVYEGLDITTNKITIQDRLGVPHHLLGEFDP  
DDGELTPSEYRLAGGLAISGIVSRQNLPIVVGGSNSLIHALVVDRFNPELNVFDGCPNVSTQ  
LRYNCCFLWVDVSLPVLCDYLCKRVDEMLEDGMLDELSEYYGSVDAASQIGLRKAIGVP  
EFDRYFKKYPPGSGCGRGIGVEWDRVRRGVYEVVREIKENTCQLAKRQIGKILRLKGAG  
WDLKRVDATESFREVMVTVSDDHIKKRKKKRWMEVWGRDVMEPSMKIVKRFLEE

>PtIPT6b

MVTDSSTAASAGVHHHKKDKILVIMGATGCGKTKVSIDLATRFHSEIINSDKIQVYKGLDII  
TNKIPVQDRLGVPHYLLGEFDPEDGELTSEFRLAGGLAISGIVSRQRLPIVVGGSNSLVHA  
LVVDRFNPELNVFDGSPNVSTQLRYNCCFLWVDVSLPVLCDYLCMRVDEMLEDGMLFDEL  
SEYYGSIDSASQTVLRKAIGGHWWGVGSGTERNIRGVREGDKGEHVSAGKEADWKDLEI  
KRCRVGPAKSGCYGEL

>PtIPT7a

MEMIPLQPKLASSMRTMPMAASLPLRMEREIRHRNNLQQITSSLYSIDDKKKQKALFVMG  
TTATGKSKLSIDLATHFQGEIINSDKIQVYKGLDMLTNKISEIERRGVPHHLLGFVEPGEEFT  
TQDFCNHVHKAMKHITGDGSIPIIAGGSNRYIEALVEDPLFNFKDSYDTCFLWVDVALPILF  
DRAAKRVDEMMLDAGLVEEVVRGMFIPGIDHNSGIWRAIGIAEMEPYFQAEMEMADEVTMK  
ILLETGIKEMKENTKKLINKQLTKIKYLANKKGWKFHRIDATCVYERSAKVDEDVWDKK  
VLRPSLEIVTNFLREDEKAEEVADSFLVTS

>PtIPT7b

MGTTATGKSKLSIDLATHFQGEIINSDKIQVYKGLDILTNKVSEDES RGVPHHLLGFVEPGE  
EFTTQDFCNHVHMAMRHIIGNGNIPPIIAGGSNRYIEALVEDPLFKDNYDTCFLWVDVALPIL  
FVRAAKRVDKMLDAGLVDEVVRGMFIPGIDHNSGIWRAIGIPELEPYFQAEMEMADEVTRK  
MLLDTGIKEMKENTKKLINKQLRKIKYLANEKGWKLHRIDATFVYERSGNVDEDVWDD  
KVLPSLEMLTNFLQEDGKAEEFVDASGLPGSFEWREKGVVTDVKIQGACGSCWAFSTT  
GSVEGANFIATRKLNLSEQQLVDCDSVTDKTS CGDGC GGGFMTNAYRCLIEAGALQEET  
GLNAILMQTCIRGVSCP VIRGKKWLNRGVLLVGN GARGYSILN

>PtIPT9

MSREQKKGKQEKGGSDVAVKV VVAVKASKEIPKTALVWALTHVVQPGDCITLLVVVPSH  
APGRRLWGFPRFAADCANGHRKSHSGATSDQRCDITDSCSQMILQLHDVYDPNKINVKIK  
IVSGSPCGAVSAEAKKAQANWVVLDKQLKHEEKRCMEELQCNIVVMKRSQAKVLRNL  
VGTSKEPEVVGPSPSKLNEASEQH SKNKNSSGSIRGPVVTPTSSPELGTPFTVTEAGTSSV  
SSDPGASPF FISETNGELKKEEPLVIKENRDLDESSD TDTEHL SLASSLRFEPWVGELLGSH  
IKSSRHVEESSQRSNCMAQTSTTEALLEKFSKLD RQTGIGMSNYRTDLDSVNVRE AISLS  
RNTPPGPPPLCSICQHKAPVFGKPPRWFSYAELELATGGFSQANFLAEGGFGSVHRGVLPD  
GQAVAVKQHKLASSQGDVEFCSEVEVLSCAQHRNVVMLIGFCIEDRRRLLVY EYICNGSL  
DSHLYGHHREPLEWSARQKIAVGAARGRLRYLHEECRVGCIVHRDMRPNNILITHDFEPLV  
GDFGLARWQPDGDTGVETR VIGTFGYLAPEYAETGQITEKADVYSFGVVLEVELVTGRKAV  
DLNRPKGQQCLTEWARPLLEEYAIVELIDPQLGNHYSEQEVYCM LHAASICIRRDPHSRPR  
MSQVLRILEGDMHVD TNYMSAPGYDVGNRSGRIYIDRTAAAAAAIKTLWCSAVNE
