# Supplementary material for: Genome-Wide Identification and Expression Analysis of Isopentenyl transferase Family Genes during Development and Resistance to Abiotic Stresses in Tea Plant (Camellia sinensis)
Source: MDPI journal article supplement (doi:10.3390/plants11172243), 2022-08-29
Supplement: s1 [file s1]

**Table S2** The grand average of hydropathy (GRAVY) and instability index of 13 CsIPT numbers

|          | GRAVY  | instability index |
|----------|--------|-------------------|
| CsIPT2   | -0.538 | 35.46             |
| CsIPT3.1 | -0.592 | 47.67             |
| CsIPT3.2 | -0.187 | 34.29             |
| CsIPT5.1 | -0.112 | 41.68             |
| CsIPT5.2 | -0.118 | 40.54             |
| CsIPT6.1 | -0.423 | 45.51             |
| CsIPT6.2 | -0.508 | 44.41             |
| CsIPT6.3 | -0.437 | 48.57             |
| CsIPT6.4 | -0.705 | 52.07             |
| CsIPT7.1 | -0.142 | 30.15             |
| CsIPT7.2 | 0.088  | 25.37             |
| CsIPT9.1 | -0.496 | 42.64             |
| CsIPT9.2 | -0.157 | 43.04             |
