# Supplementary material for: Genome-Wide Identification and Expression Analysis of Isopentenyl transferase Family Genes during Development and Resistance to Abiotic Stresses in Tea Plant (Camellia sinensis)
Source: MDPI journal article supplement (doi:10.3390/plants11172243), 2022-08-29
Supplement: s1 [file s1]

**Table S4** The primer sequences used for real-time quantitative PCR (qPCR) of *CsIPT* gene numbers and housekeeping gene of tea plant

| Primer     | 5'→3'                   | Base number (bp) | PCR product (bp) |
|------------|-------------------------|------------------|------------------|
| CsIPT2-F   | TGTGGTTGAACCTCTGCCA     | 20               | 159              |
| CsIPT2-R   | AGCACTCGATTGCCACAAGC    | 20               |                  |
| CsIPT3.1-F | AAGGTGGTGGTGGTGTATGGG   | 20               | 86               |
| CsIPT3.1-R | ACTATCTCCGCCGGGAAACG    |                  |                  |
| CsIPT3.2-F | CTGACGCCTTCCGAAAGCAC    |                  | 96               |
| CsIPT3.2-R | TGTGAAGGAAGCGGCTCACA    |                  |                  |
| CsIPT5.1-F | CGGGTTGATCGGATGGTGGA    |                  | 172              |
| CsIPT5.1-R | GTAGGCGAGCTCTGGTCTGG    |                  |                  |
| CsIPT5.2-F | CTACGAGCTCGGCTGGGTTT    |                  | 159              |
| CsIPT5.2-R | CACCACCACCACCTTGTCT     |                  |                  |
| CsIPT6.1-F | AATCGACCTCGCAACCCGAT    |                  | 113              |
| CsIPT6.1-R | ATAGGCGGTCGTGCATTGGA    |                  |                  |
| CsIPT6.2-F | ATCGACCTCGCAACCCGATT    |                  | 112              |
| CsIPT6.2-R | ATAGGCGGTCGTGCATTGGA    |                  |                  |
| CsIPT6.3-F | ACGCCACGGAGGTTATCAGG    |                  | 69               |
| CsIPT6.3-R | CCCAACTCTCGCCGGAATCT    |                  |                  |
| CsIPT6.4-F | CAACTGGGTCTGGGCAAATCG   |                  | 102              |
| CsIPT6.4-R | CGAGACCGCGGTAGACTTGT    |                  |                  |
| CsIPT7.1-F | ACAAGCTTGGTTGGCCGTTG    |                  | 94               |
| CsIPT7.1-R | GCCACAAGCTCTTCCCATGC    |                  |                  |
| CsIPT7.2-F | ACTGGTGGAGGACCCTGACT    |                  | 138              |
| CsIPT7.2-R | GGCCACGACAAACCTGCATC    |                  |                  |
| CsIPT9.1-F | CTGGGATGCAGCTGTCCAGT    |                  | 89               |
| CsIPT9.1-R | TGCGACGCAGACGATACCAA    |                  |                  |
| CsIPT9.2-F | CTCCGGAGCGTAAGGTAGCC    |                  | 74               |
| CsIPT9.2-R | CAGCTTCATCAGCAGCGCAA    |                  |                  |
| CsGAPDH F  | GAGACTGGAGCCGAATTCATT   |                  | 166              |
| CsGAPDH R1 | GATCTGGCTTGTAATCCTTCTCA |                  |                  |
